# Supplementary material for: Investigation of Genetic Variants Associated with Tryptophan Metabolite Levels via Serotonin and Kynurenine Pathways in Patients with Bipolar Disorder
Source: MDPI journal article supplement (doi:10.3390/metabo12111127), 2022-11-17
Supplement: s1 [file s1]

**Table S1. SNPs located in the *IDO1* and *IDO2* genes found to be nominally associated with the KYN/TRP ratio**

| CHR         | SNP         | EA | OA | BETA   | P      |
|-------------|-------------|----|----|--------|--------|
| <i>IDO1</i> |             |    |    |        |        |
| 8           | rs6474193   | T  | C  | 6.83   | 0.0014 |
| 8           | rs7820268   | T  | C  | 6.38   | 0.0028 |
| 8           | rs10108662  | A  | C  | 6.15   | 0.0033 |
| 8           | rs7010461   | T  | C  | 6.38   | 0.0028 |
| <i>IDO2</i> |             |    |    |        |        |
| 8           | rs117615420 | A  | C  | 8.89   | 0.034  |
| 8           | rs2340953   | C  | T  | 6.61   | 0.048  |
| 8           | rs1971708   | T  | C  | -6.50  | 0.021  |
| 8           | rs113833094 | C  | T  | 8.65   | 0.026  |
| 8           | rs116929069 | A  | G  | 8.65   | 0.026  |
| 8           | rs113043725 | T  | C  | 8.65   | 0.026  |
| 8           | rs73621342  | A  | G  | 8.65   | 0.026  |
| 8           | rs112487431 | T  | G  | 8.65   | 0.026  |
| 8           | rs147162253 | G  | A  | -10.24 | 0.021  |
| 8           | rs73605122  | G  | A  | 8.65   | 0.026  |

Analyses were adjusted for sex and diagnosis (patient with BD or control). The effect of diagnosis was not significant for any SNP.

Abbreviations: CHR, chromosome; EA, effect allele; OA, other allele; SNP, single nucleotide polymorphism

**Table S2. SNPs located in the *KMO* gene found to be nominally associated with the 3-HK/KYN ratio**

| CHR | SNP        | EA | OA | BETA   | P     |
|-----|------------|----|----|--------|-------|
| 1   | rs6658805  | G  | C  | -16.19 | 0.039 |
| 1   | rs12138459 | A  | G  | 21.11  | 0.014 |
| 1   | rs3765806  | G  | C  | 20.58  | 0.015 |
| 1   | rs12118651 | T  | C  | 20.58  | 0.015 |
| 1   | rs10926517 | A  | T  | 20.58  | 0.015 |
| 1   | rs12139931 | G  | T  | 20.58  | 0.015 |
| 1   | rs10802971 | G  | C  | 20.58  | 0.015 |
| 1   | rs3602627  | A  | G  | -18.26 | 0.019 |
| 1   | rs6429281  | T  | C  | 23.03  | 0.020 |
| 1   | rs3765809  | T  | G  | 23.44  | 0.019 |

Analyses were adjusted for sex and diagnosis (patient with BD or control). The effect of diagnosis was not significant for any SNP.

Abbreviations: CHR, chromosome; EA, effect allele; OA, other allele; SNP, single nucleotide polymorphism

**Table S3. SNPs located in the *KYNU* gene found to be nominally associated with 3-HK levels**

| CHR | SNP        | EA | OA | BETA  | P     |
|-----|------------|----|----|-------|-------|
| 2   | rs11903769 | A  | G  | -3.78 | 0.044 |
| 2   | rs11903737 | T  | C  | -3.78 | 0.044 |
| 2   | rs7424573  | T  | C  | -3.78 | 0.044 |
| 2   | rs7600006  | T  | C  | -2.90 | 0.045 |
| 2   | rs6756023  | A  | G  | -2.90 | 0.045 |
| 2   | rs12473916 | G  | A  | -2.90 | 0.045 |
| 2   | rs12473966 | G  | A  | -2.90 | 0.045 |
| 2   | rs4662307  | C  | T  | -2.90 | 0.045 |
| 2   | rs12475145 | G  | A  | -2.90 | 0.045 |
| 2   | rs6739188  | T  | A  | -2.90 | 0.045 |
| 2   | rs35202501 | G  | C  | -3.78 | 0.044 |
| 2   | rs2083373  | G  | C  | -2.90 | 0.045 |
| 2   | rs2083374  | C  | T  | -2.90 | 0.045 |
| 2   | rs6429992  | C  | T  | -2.90 | 0.045 |
| 2   | rs6429993  | C  | T  | -2.90 | 0.045 |
| 2   | rs2381355  | C  | A  | -2.90 | 0.045 |
| 2   | rs13393769 | T  | C  | -3.78 | 0.044 |
| 2   | rs6734299  | C  | A  | -2.90 | 0.045 |
| 2   | rs6709193  | T  | C  | -2.90 | 0.045 |
| 2   | rs6713123  | A  | G  | -2.90 | 0.045 |
| 2   | rs164732   | T  | C  | -2.90 | 0.045 |
| 2   | rs351707   | A  | T  | -2.90 | 0.045 |
| 2   | rs351706   | T  | G  | -2.90 | 0.045 |
| 2   | rs11692509 | C  | T  | -3.78 | 0.044 |
| 2   | rs12474744 | A  | G  | -3.78 | 0.044 |
| 2   | rs463247   | G  | C  | -2.90 | 0.045 |
| 2   | rs351701   | G  | C  | -2.90 | 0.045 |
| 2   | rs11692287 | A  | G  | -3.78 | 0.044 |
| 2   | rs3768851  | A  | C  | -3.78 | 0.044 |
| 2   | rs3768850  | T  | C  | -3.78 | 0.044 |
| 2   | rs164731   | T  | A  | -2.90 | 0.045 |
| 2   | rs6755074  | G  | T  | -3.78 | 0.044 |
| 2   | rs351708   | G  | A  | -2.90 | 0.045 |
| 2   | rs352893   | A  | C  | -3.43 | 0.020 |
| 2   | rs10179354 | A  | G  | -4.23 | 0.032 |
| 2   | rs13030111 | A  | G  | -5.16 | 0.014 |
| 2   | rs62169869 | T  | C  | -5.16 | 0.014 |
| 2   | rs3768848  | A  | G  | -5.16 | 0.014 |
| 2   | rs17805827 | A  | T  | -5.16 | 0.014 |
| 2   | rs3768847  | G  | A  | -5.16 | 0.014 |
| 2   | rs1388974  | T  | C  | -5.16 | 0.014 |
| 2   | rs12990543 | G  | A  | -5.16 | 0.014 |
| 2   | rs34082230 | T  | A  | -5.16 | 0.014 |
| 2   | rs13019625 | G  | A  | -3.72 | 0.032 |
| 2   | rs62169913 | A  | G  | -3.82 | 0.028 |

|   |            |   |   |       |       |
|---|------------|---|---|-------|-------|
| 2 | rs11686073 | A | G | -3.72 | 0.032 |
| 2 | rs6429997  | G | A | -3.13 | 0.038 |
| 2 | rs62169914 | G | A | -3.82 | 0.028 |
| 2 | rs6734849  | G | T | -3.13 | 0.038 |
| 2 | rs960822   | G | A | -3.13 | 0.038 |
| 2 | rs1371515  | G | T | -3.28 | 0.017 |
| 2 | rs352874   | T | G | -3.03 | 0.029 |
| 2 | rs11902056 | A | G | -3.27 | 0.033 |
| 2 | rs352892   | A | C | -3.41 | 0.029 |
| 2 | rs352889   | A | G | -3.41 | 0.029 |
| 2 | rs62169918 | C | T | -4.06 | 0.021 |

Analyses were adjusted for sex and diagnosis (patient with BD or control). The effect of diagnosis was not significant for any SNP.

Abbreviations: CHR, chromosome; EA, effect allele; OA, other allele; SNP, single nucleotide polymorphism
